# Supplementary material for: Zooplankton assemblages along the North American Arctic: Ecological connectivity shaped by ocean circulation and bathymetry from the Chukchi Sea to Labrador Sea
Source: Oxford University Press journal article supplement (doi:10.1525/elementa.2022.00053), 2022-01-01
Supplement: figure_s4.docx [file figure_s4.docx]

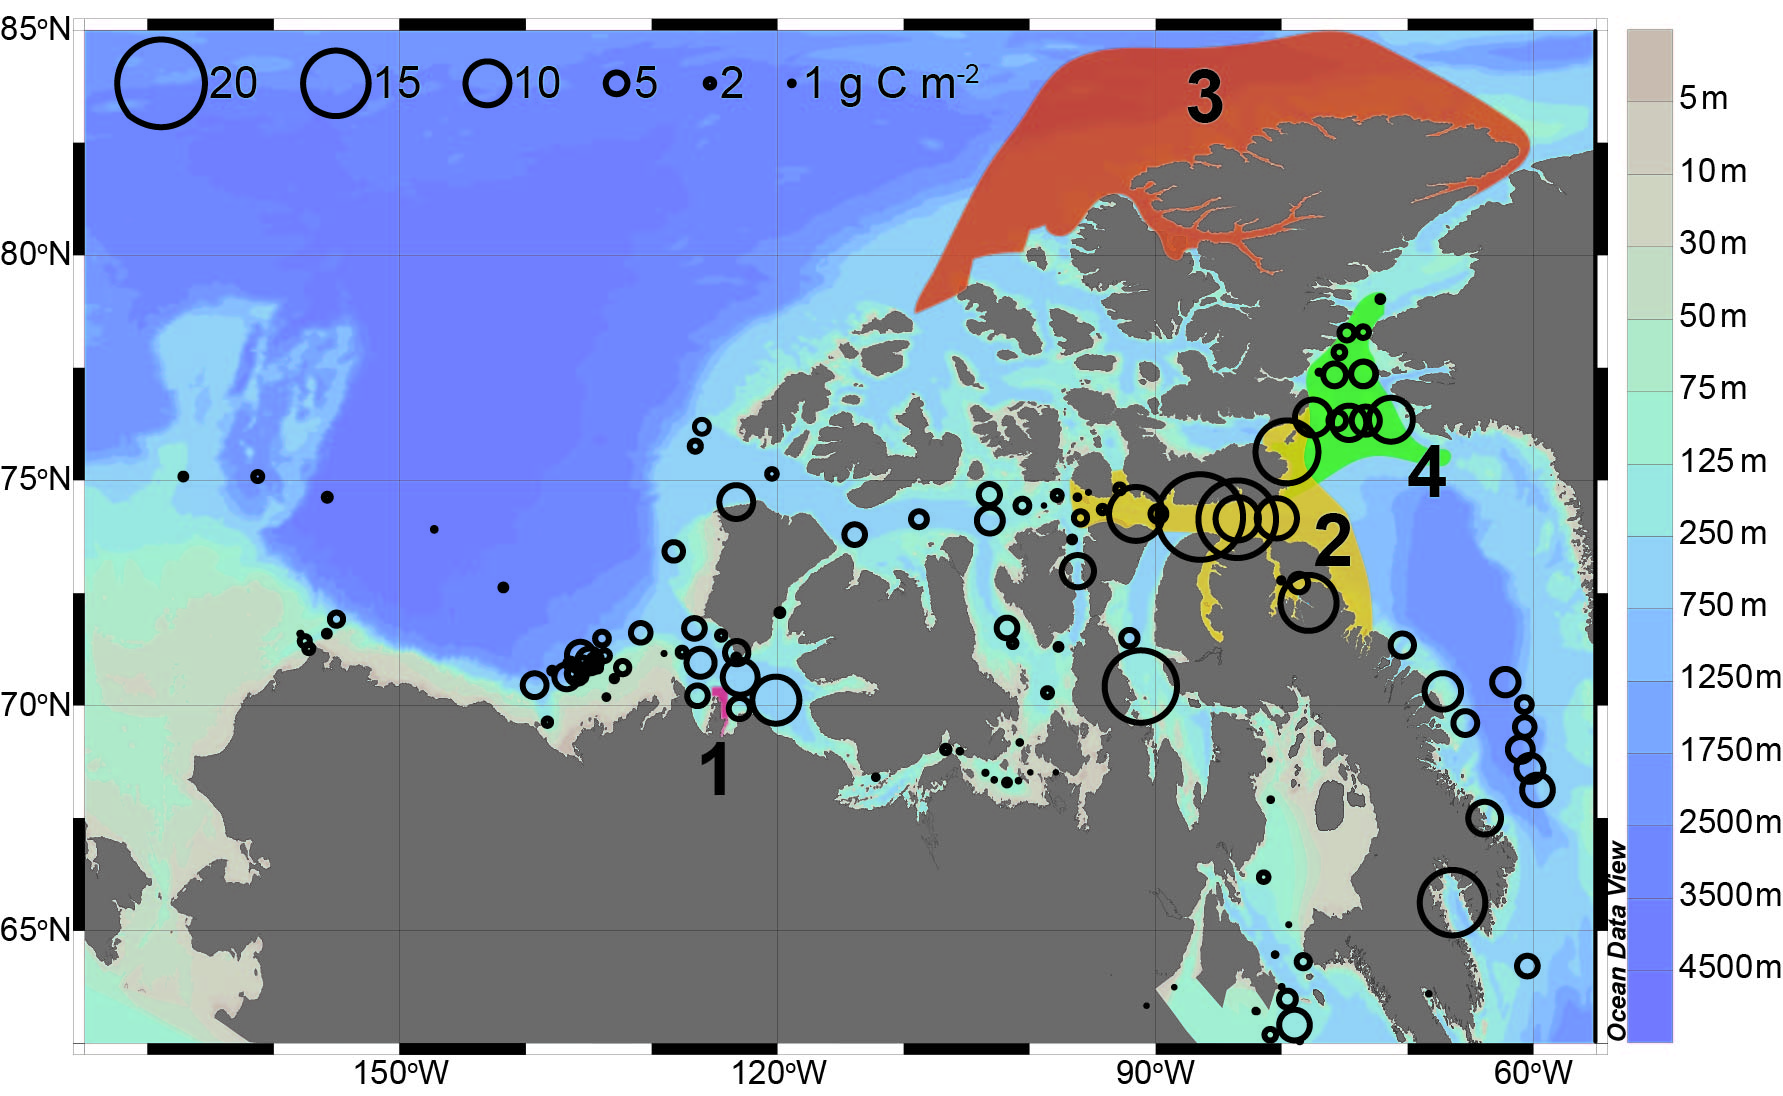


**Figure S4. Copepod biomass and actual and proposed marine protected areas (MPA) in the North American Arctic.**
