# Supplementary figures and images for: Zooplankton assemblages along the North American Arctic: Ecological connectivity shaped by ocean circulation and bathymetry from the Chukchi Sea to Labrador Sea
Source: Oxford University Press journal article supplement (doi:10.1525/elementa.2022.00053), 2022-01-01

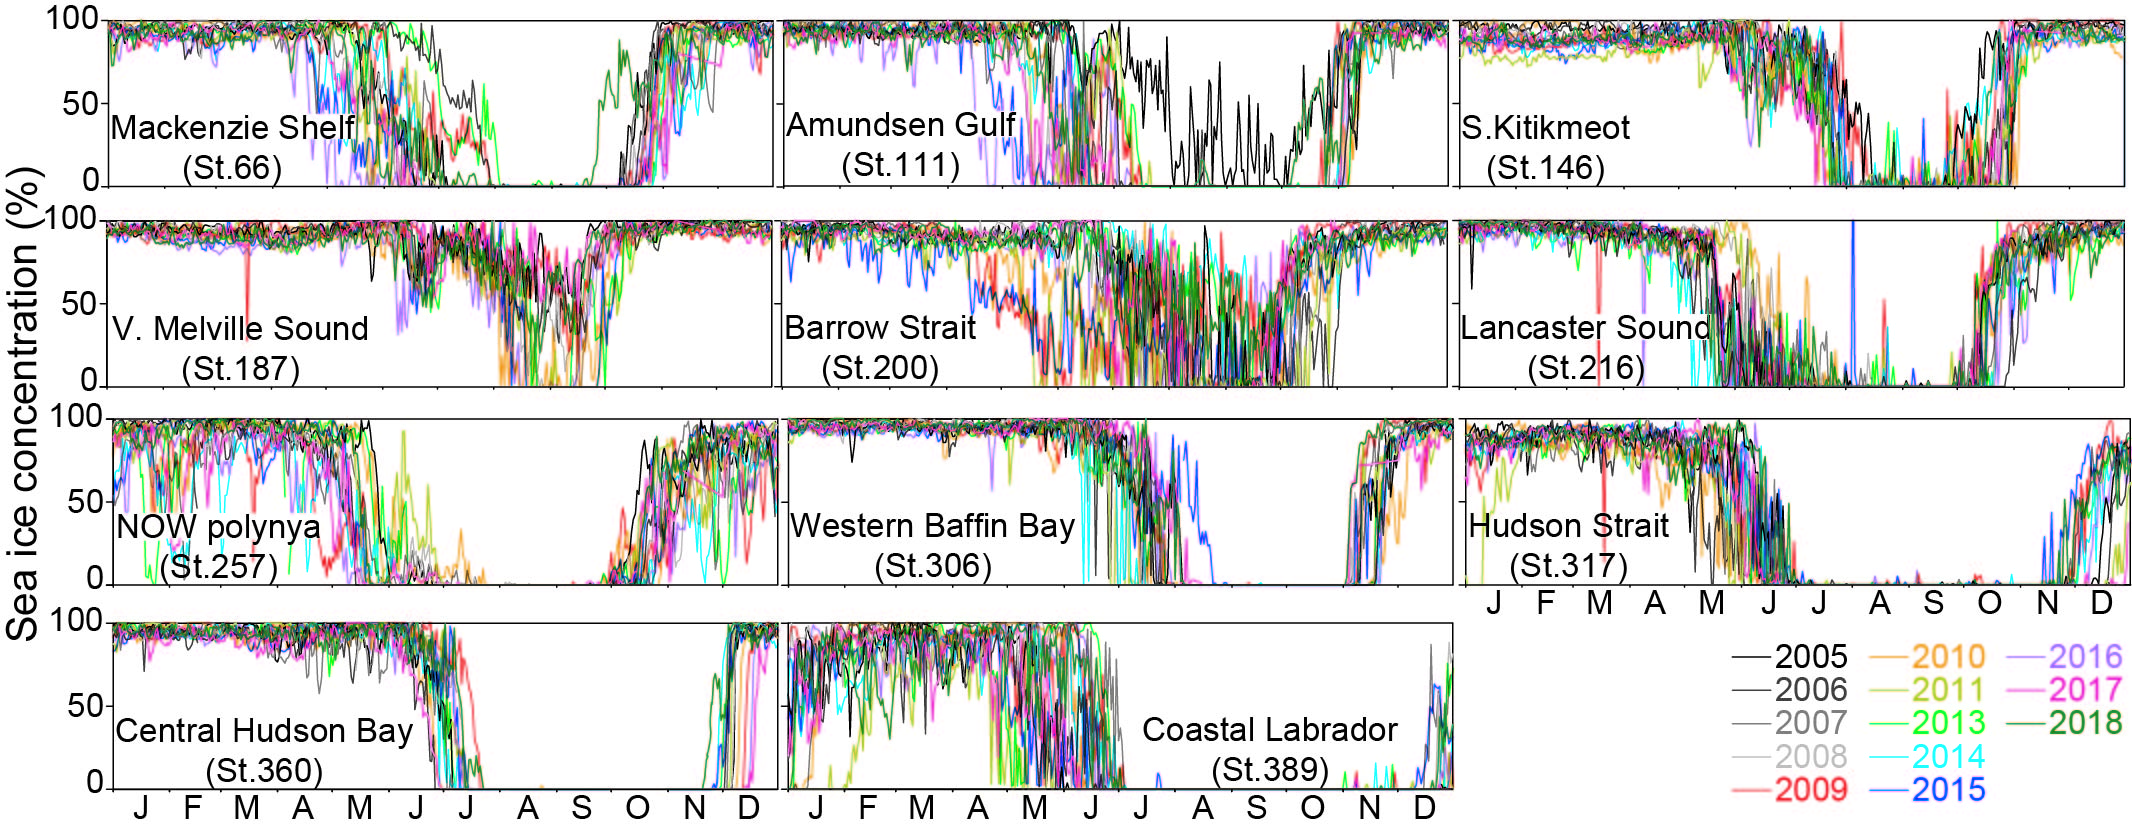


**Figure S1.** **Annual time series of sea ice concentration at several sampling sites from 2005 to 2018.**

Supplement: figure_s1.docx [file figure_s1.docx]

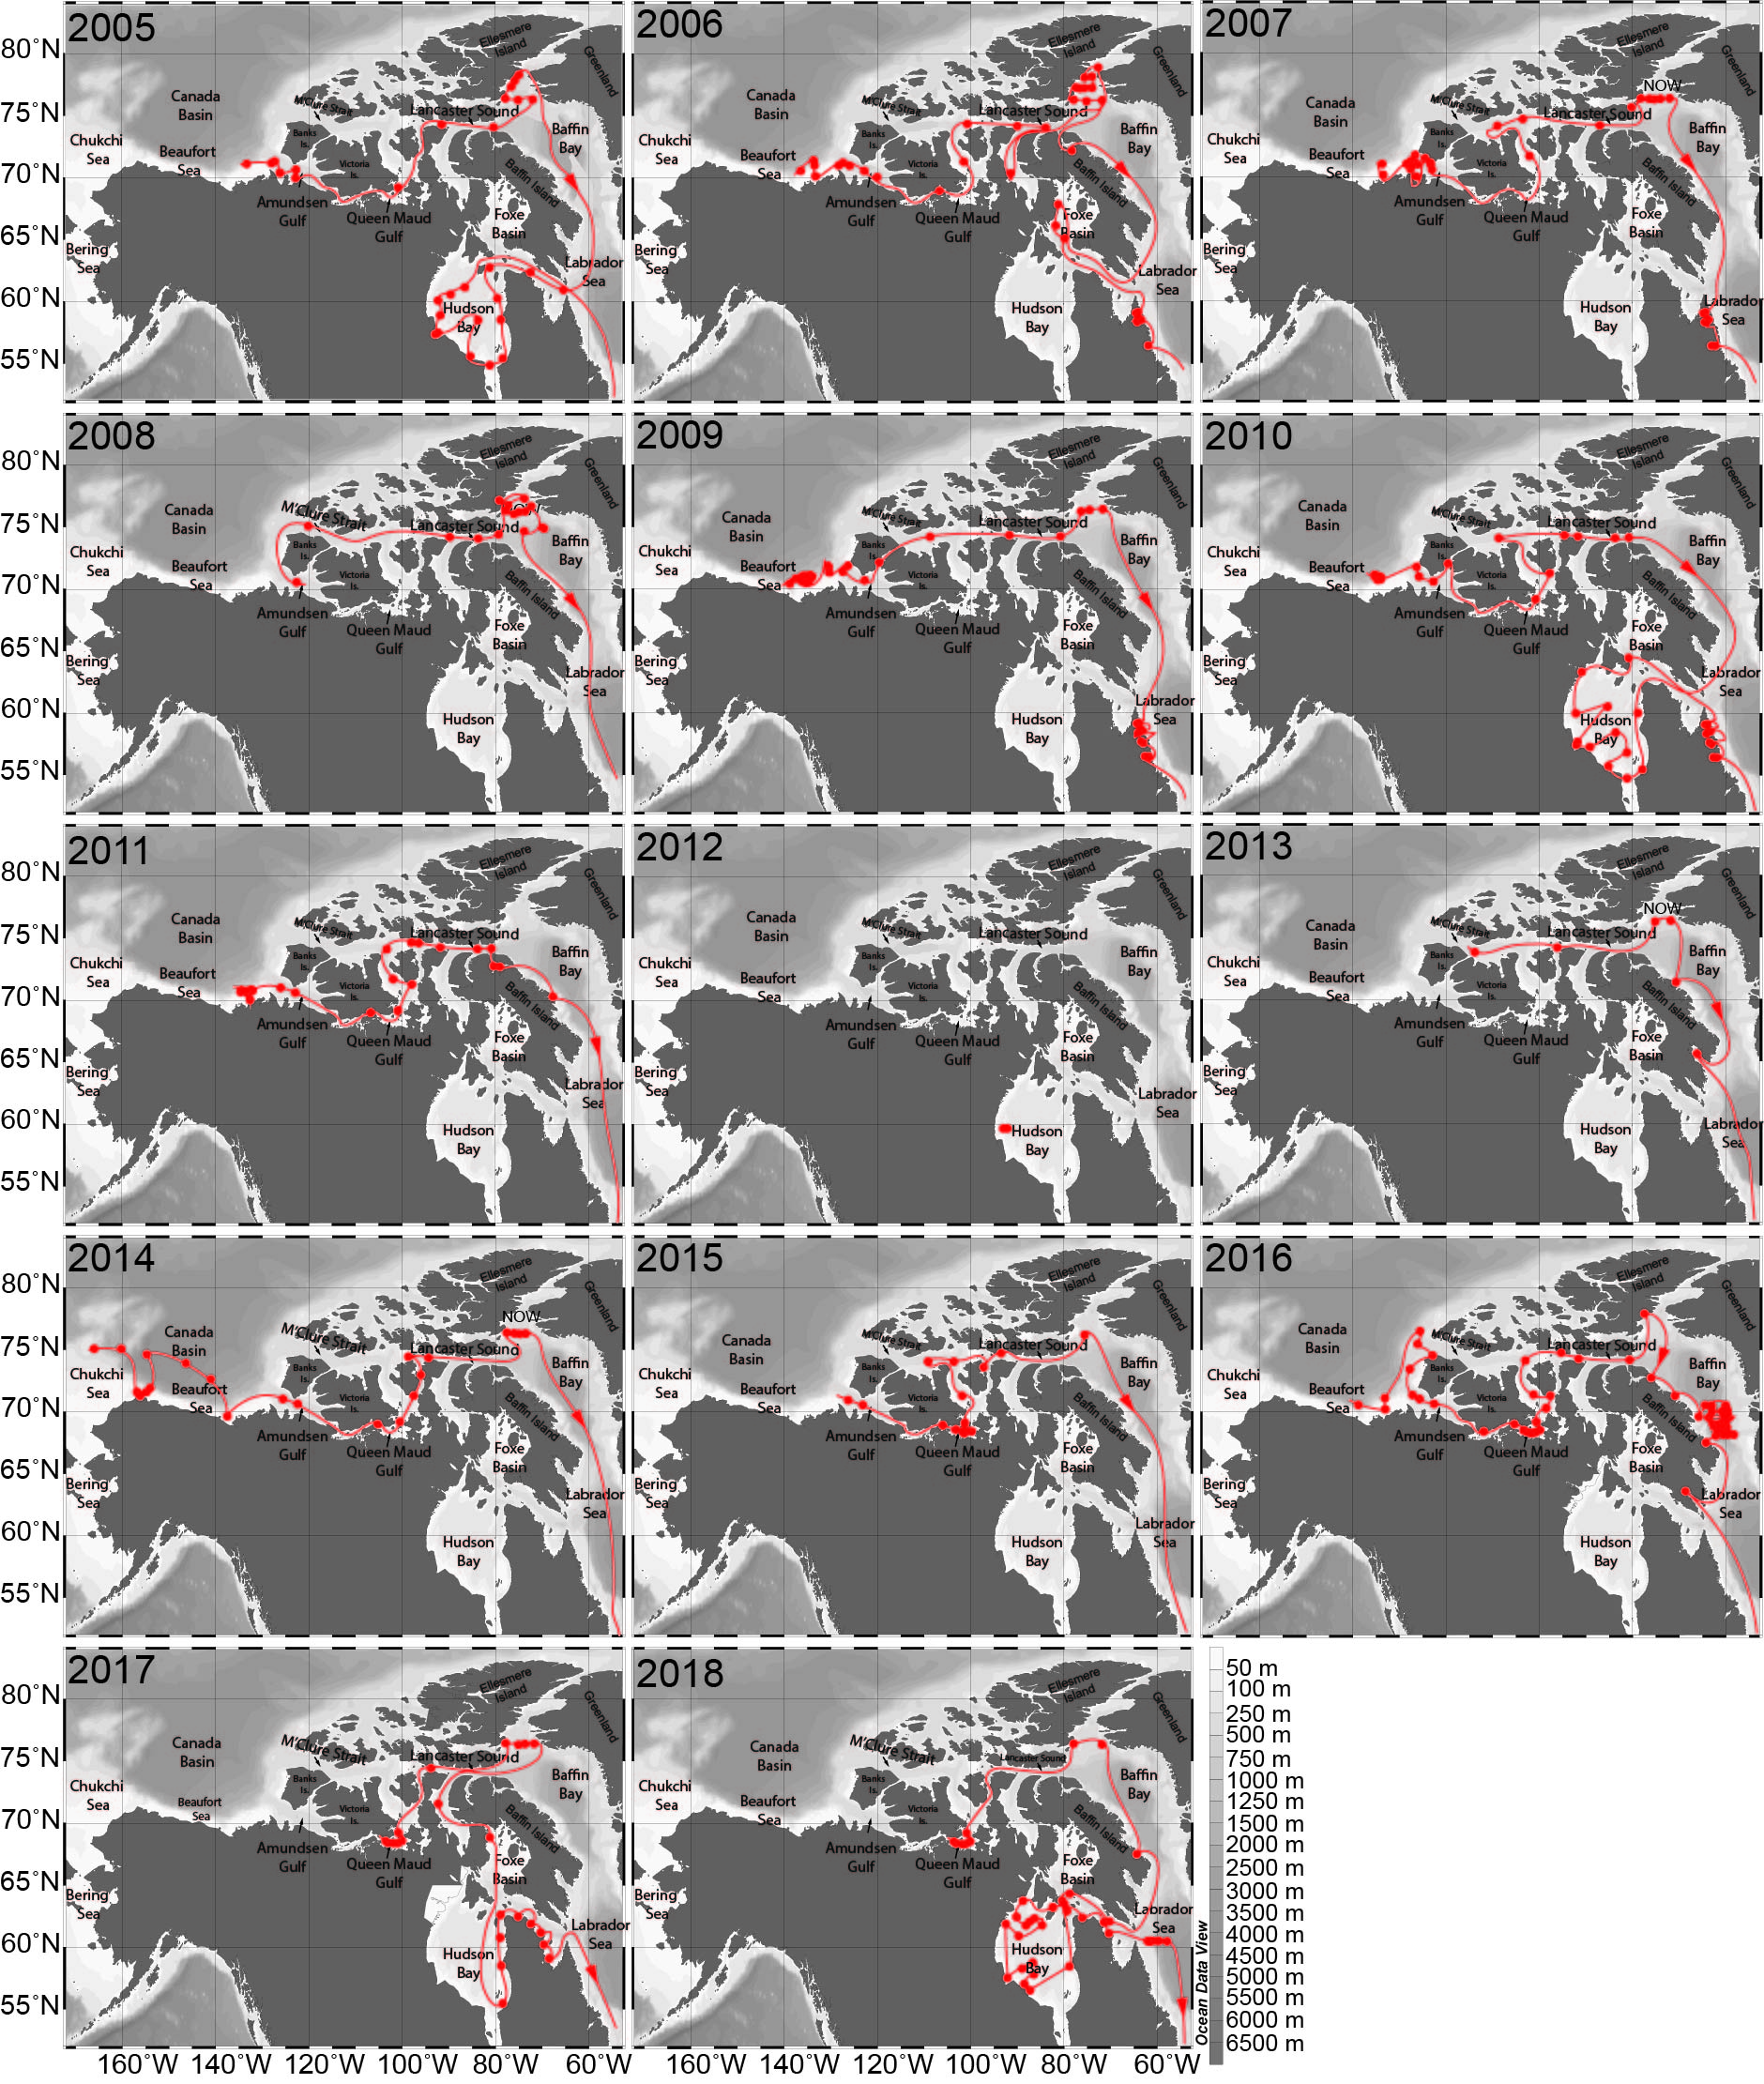


**Figure S2. Zooplankton sampling sites along the annual west-east tracks of the ship from 2005 to 2018.**

Supplement: figure_s2.docx [file figure_s2.docx]
